# Supplementary material for: A highly selective and sensitive reusable colorimetric sensor for Ag+ based on thiadiazole-functionalized polyacrylonitrile fiber
Source: Royal Society of Chemistry journal article supplement (doi:10.1039/c6tc00621c), 2016-01-01
Supplement: c6tc00621c1.pdf [file c6tc00621c1.pdf]

## Supporting Information

### A highly selective and sensitive reusable colorimetric sensor for Ag<sup>+</sup> based on thiadiazole-functionalized polyacrylonitrile fiber

Runjiao Gao<sup>a</sup>, Gang Xu<sup>a</sup>, Yujia Xie<sup>a</sup>, Lishuo Zheng<sup>a</sup>, Minli Tao<sup>\*a,b</sup> and Wenqin Zhang<sup>a,b</sup>

1. Department of Chemistry, School of Sciences, Tianjin University, Tianjin, 300072, P. R. China.

2. Collaborative Innovation Center of Chemical Science and Engineering (Tianjin), Tianjin 300072, P. R. China.

\* Corresponding author. Tel.: +86-22-2789-0922; Fax: +86-22-27403475.

E-mail: [mltao@tju.edu.cn](mailto:mltao@tju.edu.cn).

#### 1. Synthesis of DPTD

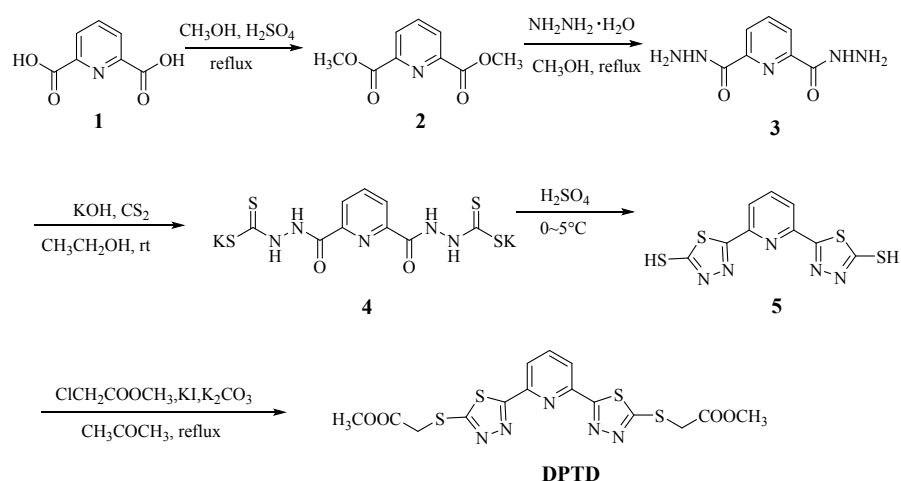

**Scheme 1.** The route for synthesis of DPTD

Compound **1** (16.7 g, 100 mmol) was dissolved in MeOH (150 mL). Concentrated  $\text{H}_2\text{SO}_4$  (10 mL) was added and the mixture was stirred at reflux for 8 h. After cooling to room temperature, the mixture was concentrated under vacuum, diluted in  $\text{H}_2\text{O}$  (30 mL) and neutralized by the addition of solid  $\text{K}_2\text{CO}_3$ . Then the solution was extracted with EtOAc ( $2 \times 50$  mL) and the organic layers were washed with brine, dried over  $\text{Na}_2\text{SO}_4$  and concentrated to give **2** as a white needle-like crystals, mp  $117-118^\circ\text{C}$  (15.6 g, 80%).  $^1\text{H NMR}$  (400 MHz,  $\text{CDCl}_3$ )  $\delta$  8.33 (d,  $J = 7.8$  Hz, 2H), 8.04 (d,  $J = 7.8$  Hz, 1H), 4.04 (s, 6H).

Intermediate **2** (9.75 g, 50 mmol) was dissolved in MeOH (100 mL), and then 80% hydrazine (30 mL) was added and the mixture was stirred at reflux for 4 h. After cooling to room

temperature, the mixture was concentrated under vacuum, diluted with H<sub>2</sub>O (50 mL) and the formed precipitate was filtered. The filtrate was washed several times with distilled water to give pure **3** as a white needle-like crystal, mp 290°C (8 g, 90%). <sup>1</sup>H NMR (400 MHz, DMSO-d<sub>6</sub>) δ 10.64 (s, 2H), 8.13 (m, 3H), 4.63 (s, 4H).

To a stirred solution of **3** (3.9 g, 20 mmol) in 20 mL of absolute ethanol containing potassium hydroxide (3.36 g, 60 mmol), carbon disulfide (4 g, 50 mmol) was added. The reaction mixture was stirred at room temperature for 6 h. Then the product was precipitated with ethyl ether, filtered off, washed with ethyl ether to give the corresponding potassium salt **4** in pure form as yellow powder. IR (KBr): ν = 3350-3280 (NH), 1688 (C=O), 1259 (C=S) cm<sup>-1</sup>.

To a stirred ice-cold concentrated sulfuric acid 10 mL, potassium salt **4** obtained above was added. The reaction mixture was left over night and then gradually added to crush ice. The separated precipitate was filtered off, washed with water, dried, and crystallized from ethanol to give **5** as yellowish powder, mp 288-300°C (4.2 g, 78%). <sup>1</sup>H NMR (400 MHz, DMSO-d<sub>6</sub>) δ 14.92 (s, 2H), 8.27 (d, J = 7.8 Hz, 2H), 8.10 (d, J = 7.8 Hz, 1H). <sup>13</sup>C-NMR (400 MHz, DMSO-d<sub>6</sub>): δ 122.11, 140.50 147.43 (5C, pyrid-C), 160.09, 189.57 (4C, thiadiazole ring). IR (KBr): ν = 3345-3302 (NH), 1662 (C=N), 1660 (C=C), 1242 (C=S) cm<sup>-1</sup>.

To a suspension of K<sub>2</sub>CO<sub>3</sub> (3.32 g, 24 mmol) and KI (catalytic amount) in 30 mL of anhydrous acetone, **5** (3.11 g, 10 mmol) dissolved in 30 mL of the same solvent were added under stirring. The mixture was refluxed for 0.5 h. Methyl chloroacetate (2.39 g, 22 mmol) was dropped slowly into the stirred mixture. After 8 h, the solvent was completely evaporated in vacuum and the solid residue was washed with distilled water, collected by filtration and recrystallized from absolute ethanol to obtain the target product DPTD, m.p. 155°C (3.6 g, 79 %). <sup>1</sup>H NMR (400 MHz, CDCl<sub>3</sub>) δ 8.34 (d, J = 7.8 Hz, 2H), 8.01 (d, J = 7.8 Hz, 1H) 4.24 (s, 4H), 3.83 (s, 6H). <sup>13</sup>C-NMR (400 MHz, DMSO-d<sub>6</sub>): δ 122.58, 140.55, 148.69 (5C, pyrid-C), 169.07, 168.87, 167.09 (3C, thiadiazole ring), 53.17 (2C, CH<sub>3</sub>). IR (KBr): ν = 3345-3302 (NH), 1662 (C=N), 1660 (C=C), 1242 (C=S) cm<sup>-1</sup>.

## 2. Response time of the colorimetric fiber

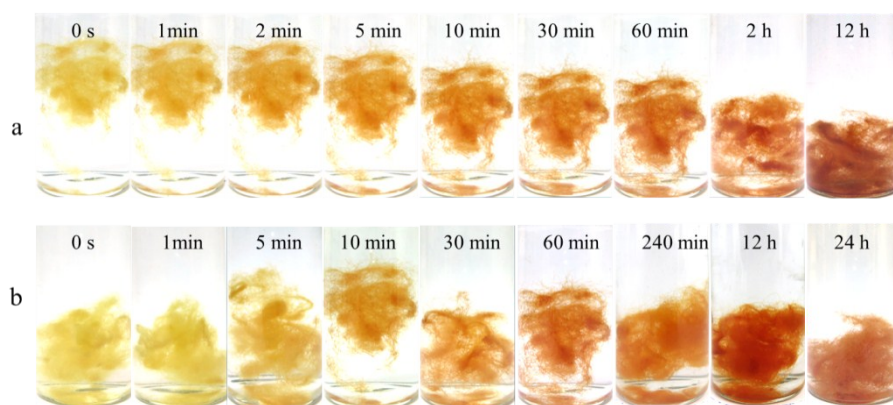

Fig. S1. Response time of DPTD-PAN<sub>p</sub>F towards Ag<sup>+</sup> with the concentration of (a)  $1 \times 10^{-4}$  mol/L and (b)  $1 \times 10^{-5}$  mol/L.

### 3. Reusability of the colorimetric fiber

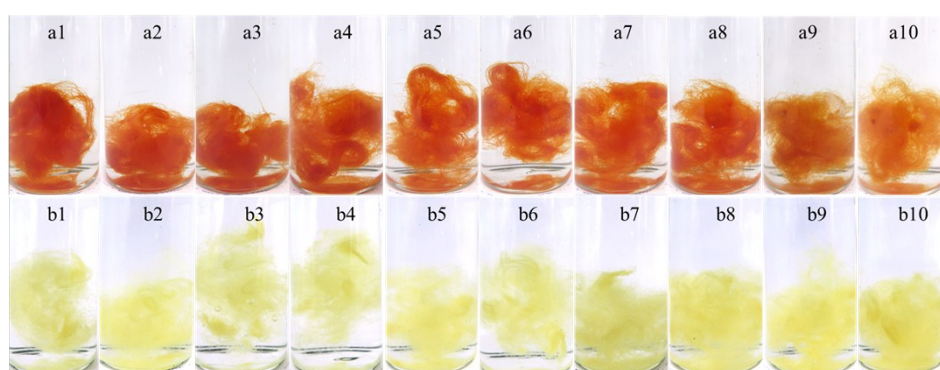

Fig. S2. Reusability of DPTD-PAN<sub>p</sub>F in water after the 1st-10th (a1-a10) absorption and the 1st-10th (b1-b10) desorption in  $1 \times 10^{-5}$  mol/L Ag<sup>+</sup> solution.

### 4. Adsorption capacity of DPTD-PAN<sub>p</sub>F

Table S1. Adsorption capacities of some adsorbents for Ag<sup>+</sup>

| Adsorbents                               | Contact time | pH  | $q_e$ (mg/g) | Reference |
|------------------------------------------|--------------|-----|--------------|-----------|
| es-PAN-DNPH                              | 24 h         | 4.5 | 6.5          | 1         |
| clinoptilolite                           | 5 min        | 4   | 17           | 2         |
|                                          | 45 min       |     | 33.23        |           |
| brewery's waste biomass                  | 24 h         | 4   | 42.72        | 3         |
| chitosan/bamboo charcoal composite beads | 180 min      | 6   | 52.91        | 4         |
| CS/PVA                                   | 40 min       | 6   | 77.8         | 5         |
| Imprinted CS/PVA                         |              |     | 125          |           |
| MCM-41                                   | 60 min       | 5   | 92.08        | 6         |
| PAN-TETA                                 | 60 min       | 6   | 108.14       | 7         |
| Nano-TiO <sub>2</sub> -MBI               | 60 min       | 6   | 128.2        | 8         |
| SfGM                                     | 60 min       | 6   | 137.9        | 9         |

|                         |        |   |        |            |
|-------------------------|--------|---|--------|------------|
| DPTD-PAN <sub>p</sub> F | 5 min  |   | 85.32  | This study |
|                         | 30 min | 5 | 119.88 |            |
|                         | 60 min |   | 149.04 |            |

### 3. <sup>1</sup>H and <sup>13</sup>C NMR spectra

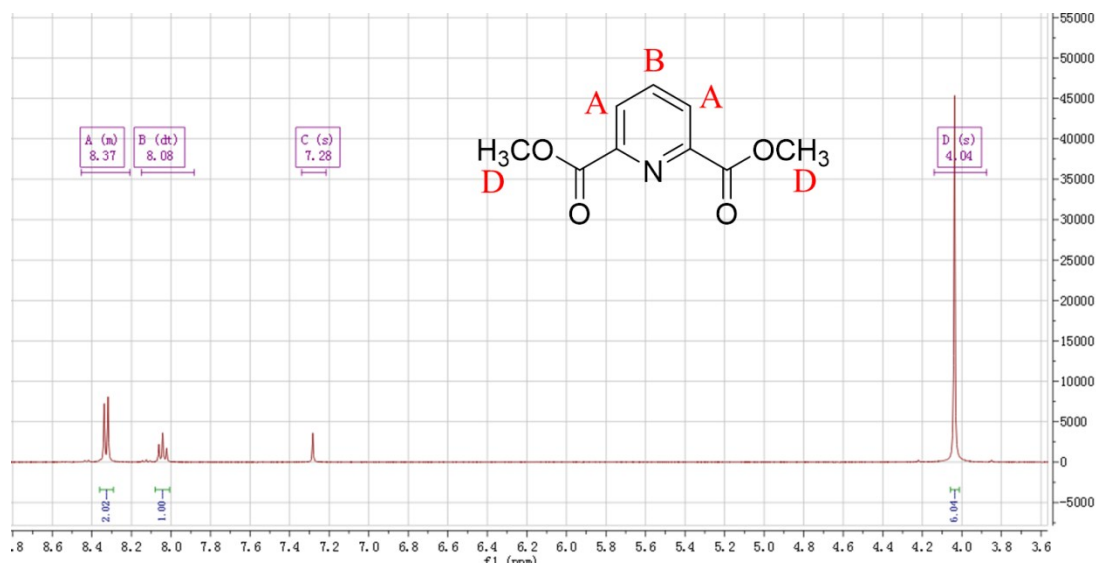

**Fig. S3.** <sup>1</sup>H NMR spectra of dimethyl pyridine-2,6-dicarboxylate (2) in CDCl<sub>3</sub>.

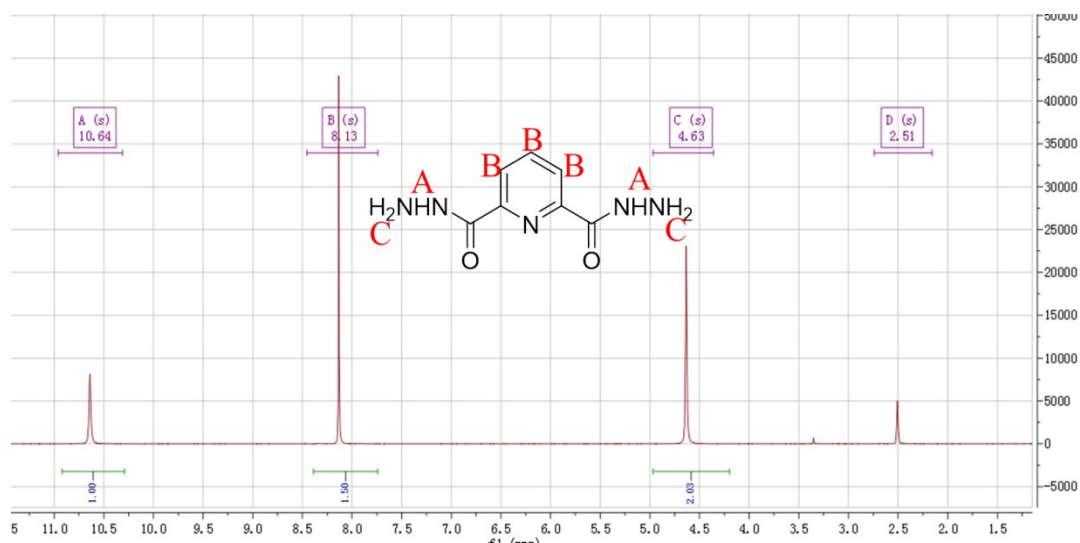

**Fig. S4.** <sup>1</sup>H NMR spectra of pyridine-2,6-dicarbohydrazide (3) in DMSO.

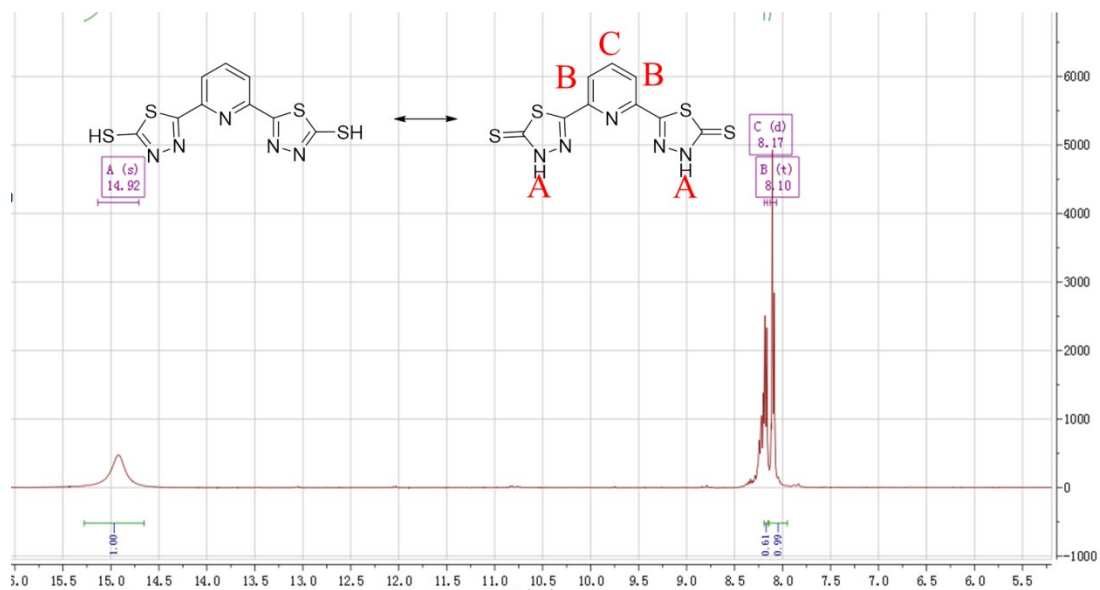

**Fig. S5.** <sup>1</sup>H NMR spectra of 5,5'-(pyridine-2,6-diyl)bis(1,3,4-thiadiazole-2-thiol) (5) in DMSO

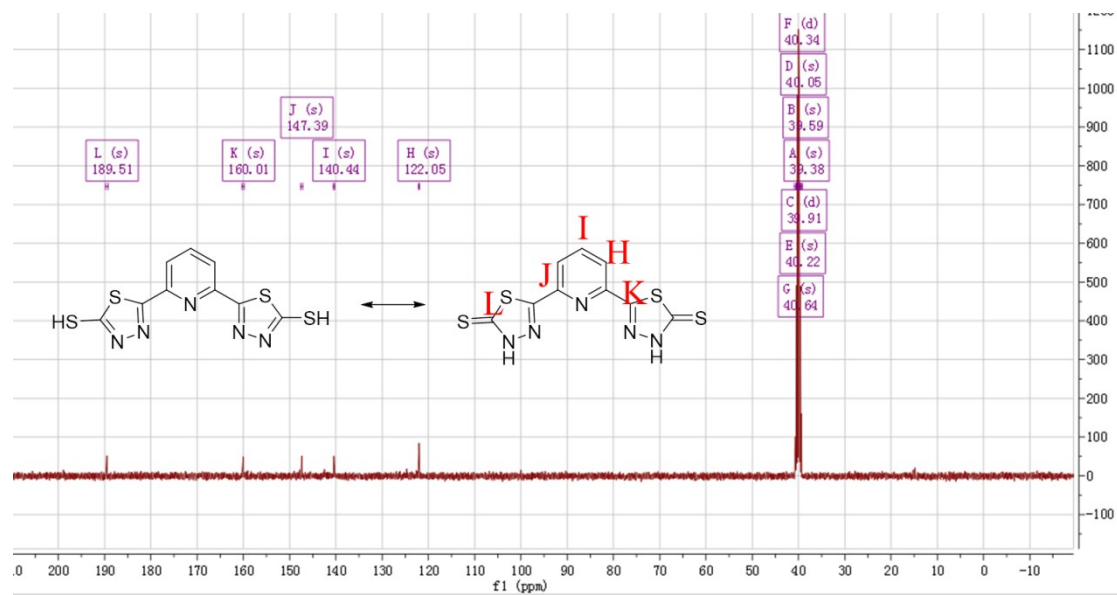

**Fig. S6.** <sup>13</sup>C NMR spectra of 5,5'-(pyridine-2,6-diyl)bis(1,3,4-thiadiazole-2-thiol) (5) in DMSO

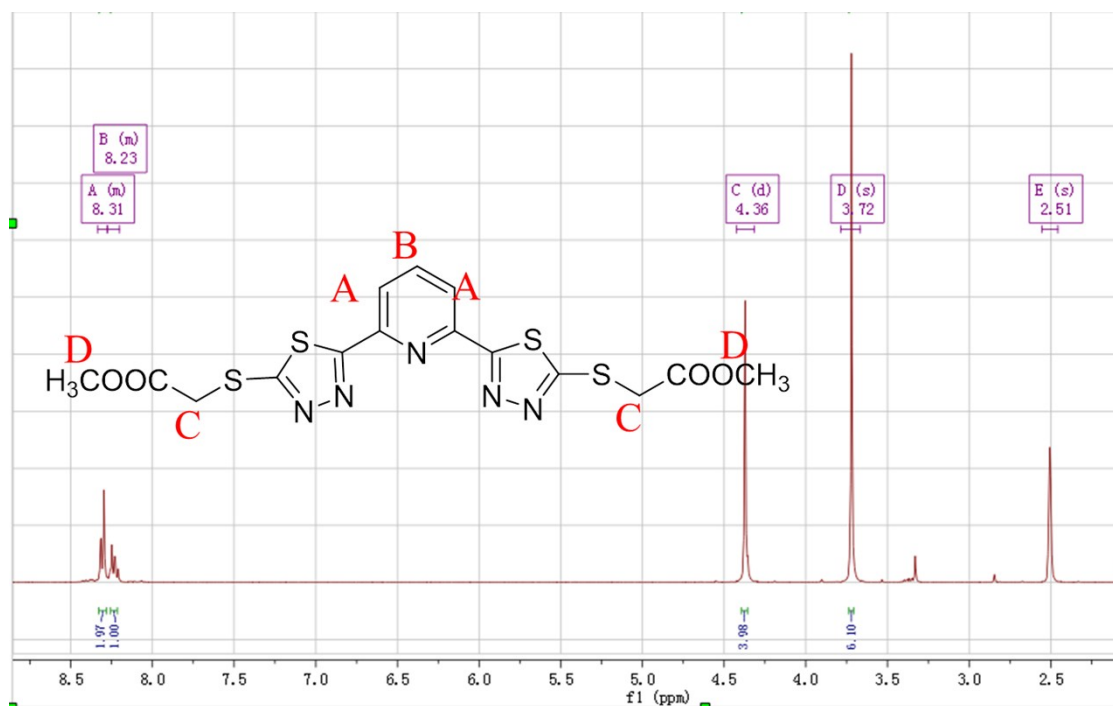

**Fig. Fig.S7.**  $^1\text{H}$  NMR spectra of Dimethyl 2,2'-{2,6-pyridine-diylbis[5,2-(1,3,4-thiadiazole)diyl]thio}-diacetate (DPTD) in DMSO

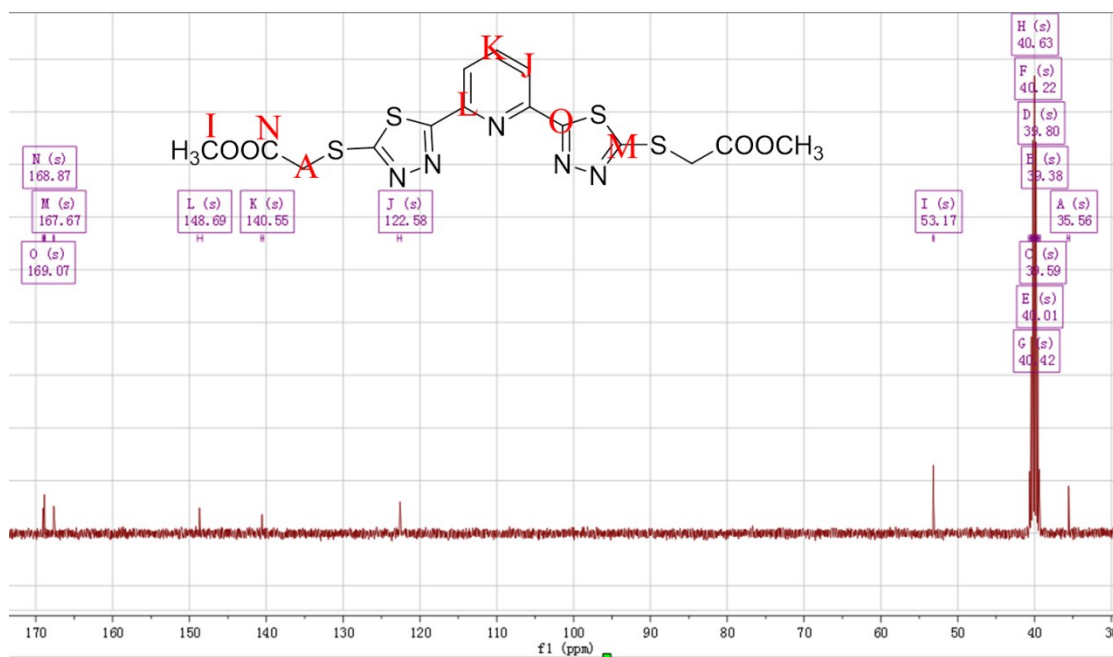

**Fig. S8.**  $^{13}\text{C}$  NMR spectra of Dimethyl 2,2'-{2,6-pyridine-diylbis[5,2-(1,3,4-thiadiazole)diyl]thio}-diacetate (DPTD) in DMSO

## References

1. S. Jitjaicham, *Express Polym. Lett.*, 2013, **7**, 832-841.
2. M. Akgül, A. Karabakan, O. Acar and Y. Yürüm, *Microporous Mesoporous Mater.*, 2006, **94**, 99-104.
3. C. Chen and J. Wang, *J. Hazard. Mater.*, 2008, **151**, 65-70.
4. W. Nitayaphat and T. Jintakosol, *J. Clean. Prod.*, 2015, **87**, 850-855.
5. H. A. Shawky, *J. Appl. Polym. Sci.*, 2009, **114**, 2608-2615.
6. S. Wu, F. Li, R. Xu, S. Wei and G. Li, *J. Nanopart. Res.*, 2009, **12**, 2111-2124.
7. G. Kiani and M. Soltanzadeh, *Desalin. Water Treat.*, 2014, **52**, 3206-3218.
8. N. Pourreza, S. Rastegarzadeh and A. Larki, *J. Ind. Eng. Chem.*, 2014, **20**, 127-132.
9. D. Das, R. Vimala and N. Das, *Eco. Eng.*, 2015, **75**, 116-122.
